# Supplementary material
Source: MDPI journal article supplement (https://www.mdpi.com/2071-1050/8/9/799)
Supplement: s1 [file s1]

# Supplementary Materials: How Does the Environmental Impact of Household Consumption Depend on Residential Location?

Age Poom and Rein Ahas

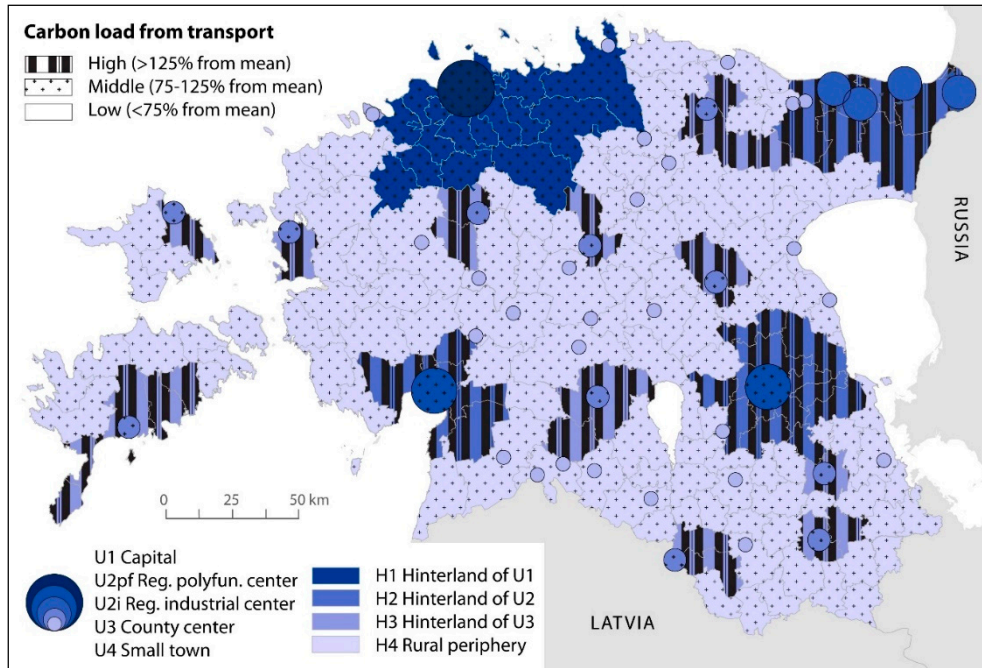

**Figure S1.** The spatial patterns of relative per capita carbon load from transport in comparison to mean carbon load across settlement hierarchy levels.

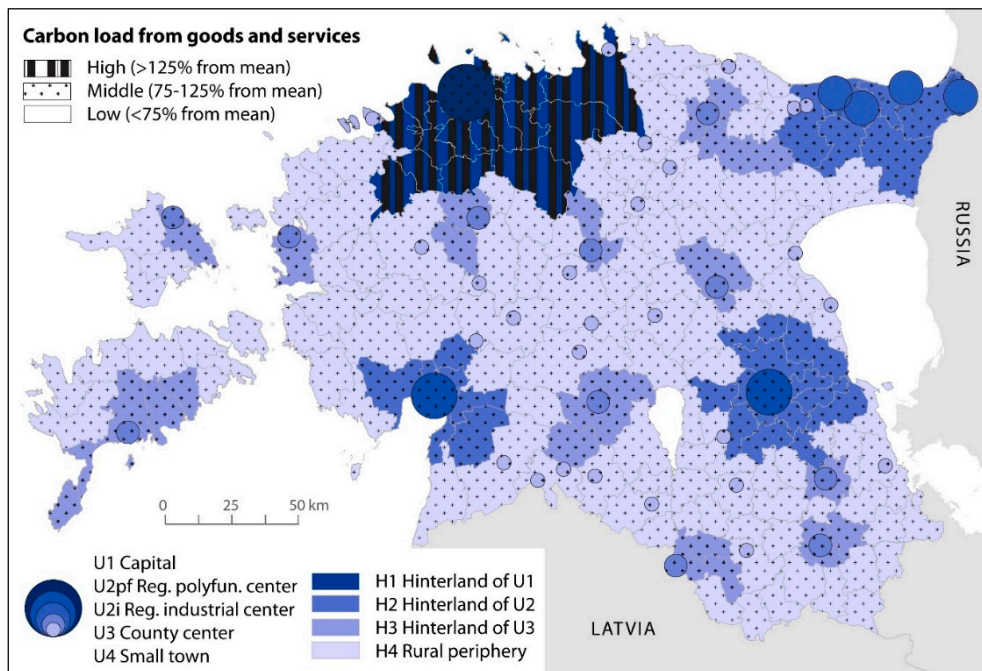

**Figure S2.** The spatial patterns of relative per capita carbon load from consumer goods and services in comparison to mean carbon load across settlement hierarchy levels.

**Table S1.** Emission intensities of various consumption categories used in the analysis based on [1,2] and input-output computing.

| <b>Consumption Categories</b>                                                                                | <b>kg CO<sub>2</sub>/€</b> | <b>kg CO<sub>2</sub>/kWh</b> |
|--------------------------------------------------------------------------------------------------------------|----------------------------|------------------------------|
| Food and beverages                                                                                           | 0.978                      | 0.314                        |
| Natural water, water treatment, and supply services;<br>sewerage; waste management                           | 1.098                      | 0.330                        |
| Construction and maintenance services                                                                        | 0.860                      | 0.320                        |
| Electricity, gas, district heating, and hot water                                                            | 14.57                      | 0.347                        |
| Gasoline                                                                                                     | 5.286                      | 0.312                        |
| Diesel                                                                                                       | 5.457                      | 0.313                        |
| LPG                                                                                                          | 5.373                      | 0.293                        |
| Light and heavy fuel oil                                                                                     | 5.802                      | 0.310                        |
| Coal, oil shale                                                                                              | 17.92                      | 0.348                        |
| Charcoal                                                                                                     | 10.49                      | 0.314                        |
| Wood pellets                                                                                                 | 12.76                      | 0.263                        |
| Firewood; non-specified solid fuels                                                                          | 13.42                      | 0.376                        |
| Wood briquettes                                                                                              | 14.79                      | 0.377                        |
| Peat briquette                                                                                               | 14.97                      | 0.341                        |
| Textiles, garments, and leather products                                                                     | 0.386                      | 0.328                        |
| Paper and paper products                                                                                     | 2.225                      | 0.330                        |
| Pharmaceutical products; chemical products                                                                   | 0.412                      | 0.307                        |
| Furniture; other manufactured goods                                                                          | 0.790                      | 0.329                        |
| Rubber and plastic products; fabricated metallic and<br>non-metallic mineral products; wood products         | 1.224                      | 0.335                        |
| Computer, electronic, and optical products; electrical<br>equipment; machinery and equipment; motor vehicles | 0.181                      | 0.331                        |
| Land transport services                                                                                      | 1.389                      | 0.297                        |
| Water transport services                                                                                     | 1.037                      | 0.332                        |
| Air transport services                                                                                       | 1.537                      | 0.295                        |
| Maintenance and repair services of motor<br>vehicles and large-scale durables                                | 0.785                      | 0.329                        |
| Postal and courier services; parking lot services                                                            | 1.043                      | 0.309                        |
| Accommodation and food services                                                                              | 1.201                      | 0.333                        |
| Telecommunications services, printed materials, recording media                                              | 0.336                      | 0.334                        |
| Education services                                                                                           | 0.885                      | 0.334                        |
| Human health services; residential care services; social work services                                       | 0.651                      | 0.331                        |
| Cultural, sporting, and recreation services                                                                  | 1.060                      | 0.336                        |
| Repair services of computers and personal and<br>household goods; other personal services                    | 0.925                      | 0.329                        |
| Financial services, insurance, and pension funding services                                                  | 0.199                      | 0.333                        |
| Real estate services                                                                                         | 0.561                      | 0.332                        |
| Legal and accounting services; other professional<br>and technical services; veterinary services             | 0.308                      | 0.326                        |
| Rental and leasing services; security; travel agency,<br>tour operator and other reservation services        | 0.410                      | 0.320                        |

## References

1. Ministry of the Environment. *Greenhouse Gas Emissions in Estonia 1990–2012: National Inventory Report under the UNFCCC and the Kyoto Protocol*; Ministry of the Environment: Tallinn, Estonia, 2014; p. 335.
2. Statistics Estonia. Statistical Databases: Economy. Available online: <http://pub.stat.ee/px-web.2001/dialog/statfile1.asp> (accessed on 5 January 2015).
